# Supplementary material for: A Novel Quantum Dots-Based Fluorescent Sensor for Determination of the Anticancer Dacomitinib: Application to Dosage Forms
Source: MDPI journal article supplement (doi:10.3390/molecules28052351), 2023-03-03
Supplement: s1 [file s1]

# **A Novel Quantum Dots-Based Fluorescent Sensor for Determination of the Anticancer Dacomitinib: Application to Dosage Forms**

**Manal A. Alossaimi <sup>1,\*</sup>, Heba Elmansi <sup>2</sup>, Mai Alajaji <sup>3</sup>, Ali Altharawi <sup>1</sup>, Abdulmalik S. A. Altamimi <sup>1</sup> and Galal Magdy <sup>4</sup>**

<sup>1</sup> Pharmaceutical Chemistry Department, College of Pharmacy, Prince Sattam Bin Abdulaziz University, Al-Kharj 11942, Saudi Arabia

<sup>2</sup> Pharmaceutical Analytical Chemistry Department, Faculty of Pharmacy, Mansoura University, Mansoura P.O. Box 35516, Egypt

<sup>3</sup> King Abdullah International Medical Research Center, College of Pharmacy, King Saud bin Abdulaziz University for Health Sciences, Riyadh 14611, Saudi Arabia

<sup>4</sup> Pharmaceutical Analytical Chemistry Department, Faculty of Pharmacy, Kafrelsheikh University, Kafrelsheikh P.O. Box 33511, Egypt

\* Correspondence: m.alossaimi@psau.edu.sa

## **Supplementary Figures**

**Figure S1.** Optical images of the prepared N-CQDs under (a) visible light, and (b) UV light

**Figure S2.** UV absorption spectrum of N-CQDs

**Figure S3.** Fluorescence spectra of N-CQDs; (a) excitation and (b) emission spectra

**Figure S4.** The typical HRTEM image of N-CQDs

**Figure S5.** TEM-EDX analysis of the prepared N-CQDs

**Figure S6.** FTIR spectrum presenting the surface functionality of N-CQDs

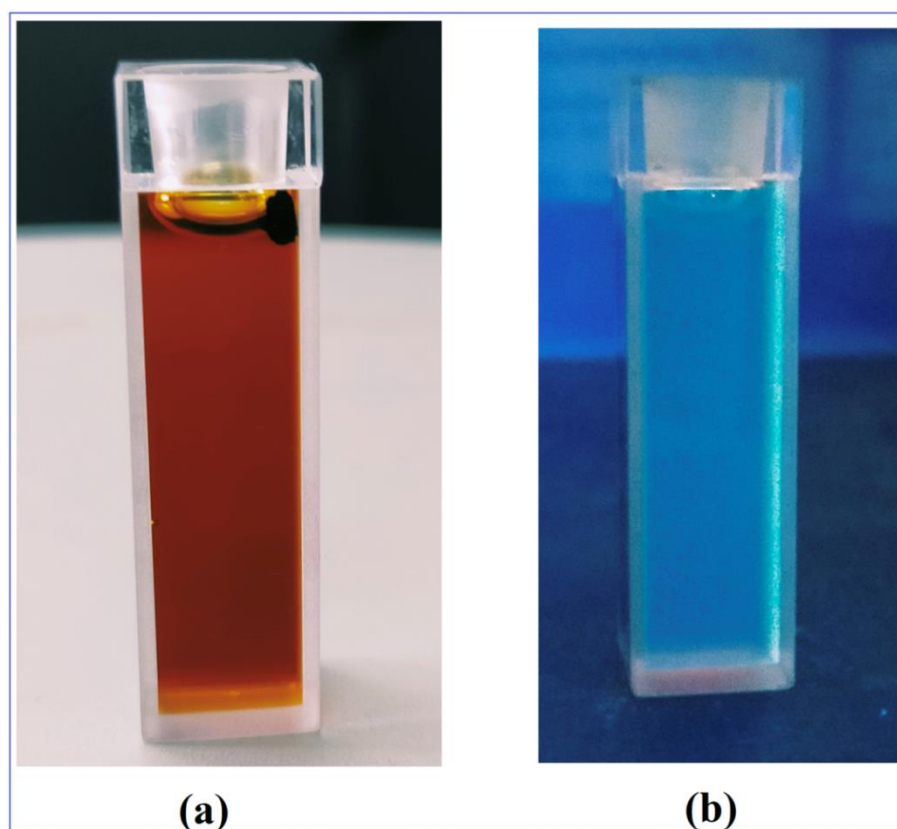

**Figure S1.** Optical images of the prepared N-CQDs under (a) visible light, and (b) UV light.

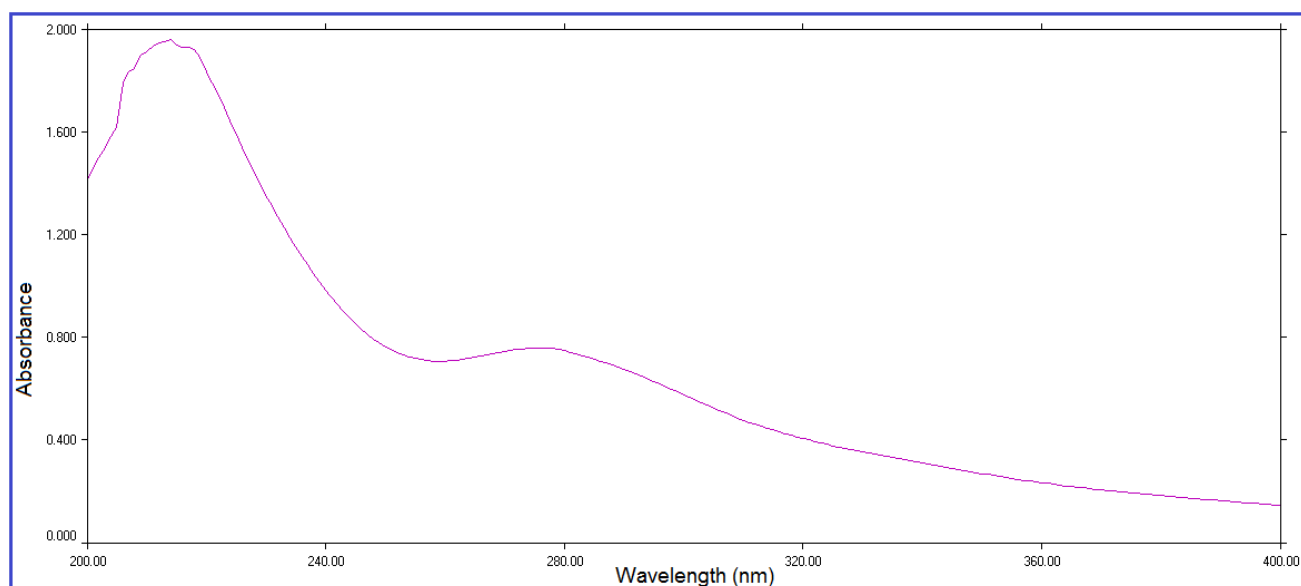

**Figure S2.** UV absorption spectrum of N-CQDs.

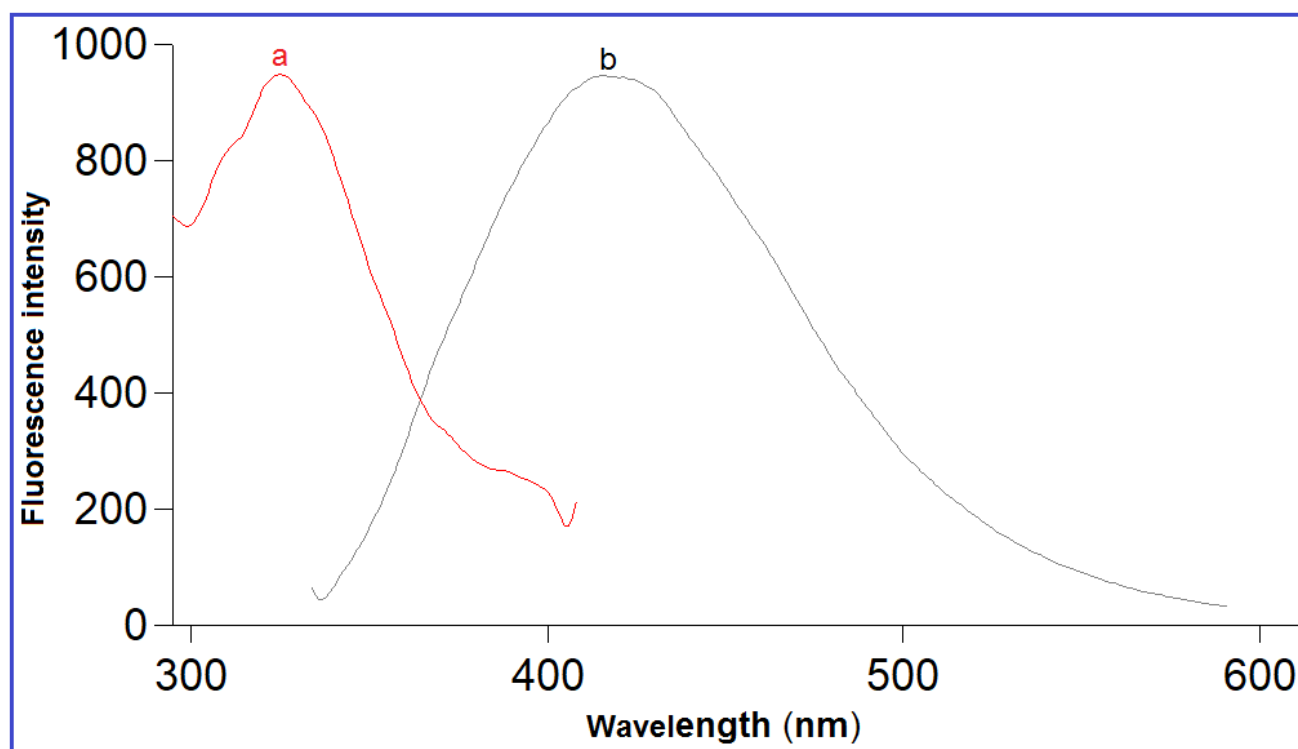

Figure S3. Fluorescence spectra of N-CQDs; (a) excitation and (b) emission spectra.

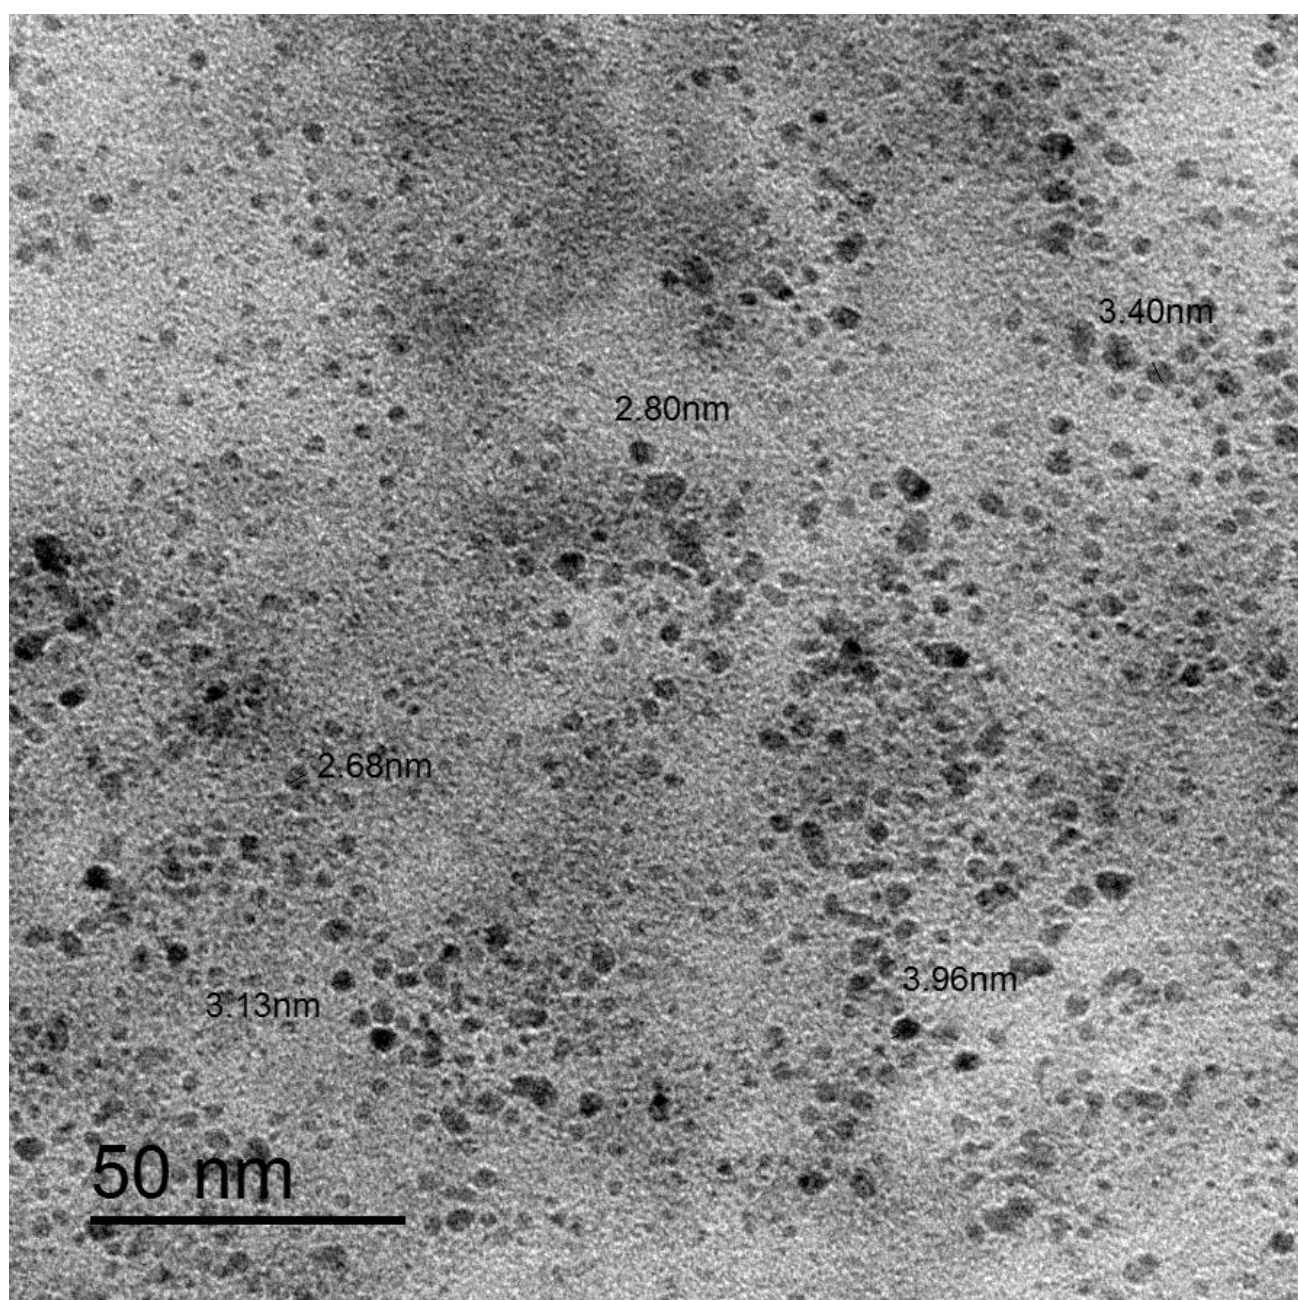

**Figure S4.** The typical HRTEM image of N-CQDs.

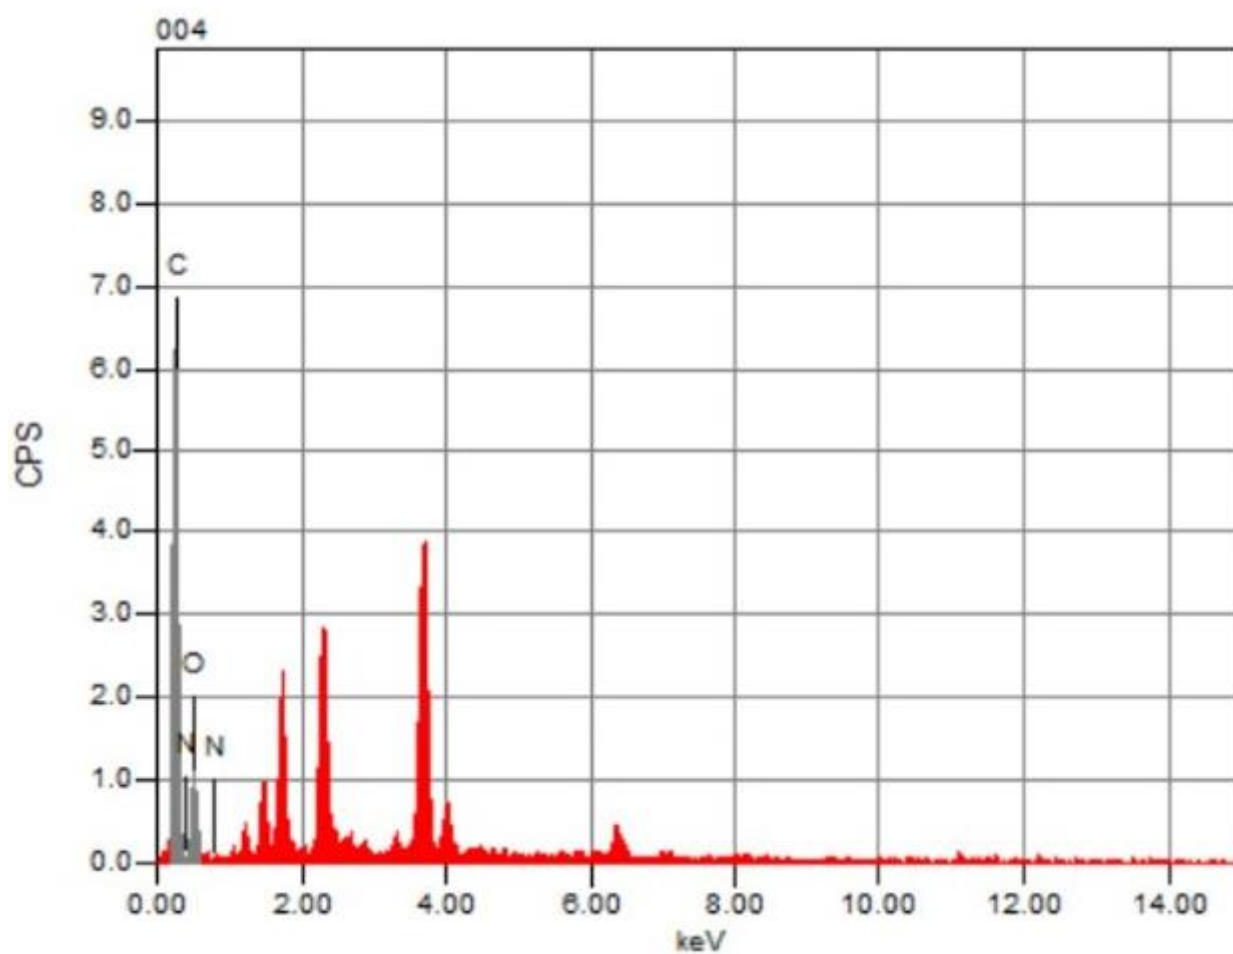

Figure S5. TEM-EDX analysis of the prepared N-CQDs.

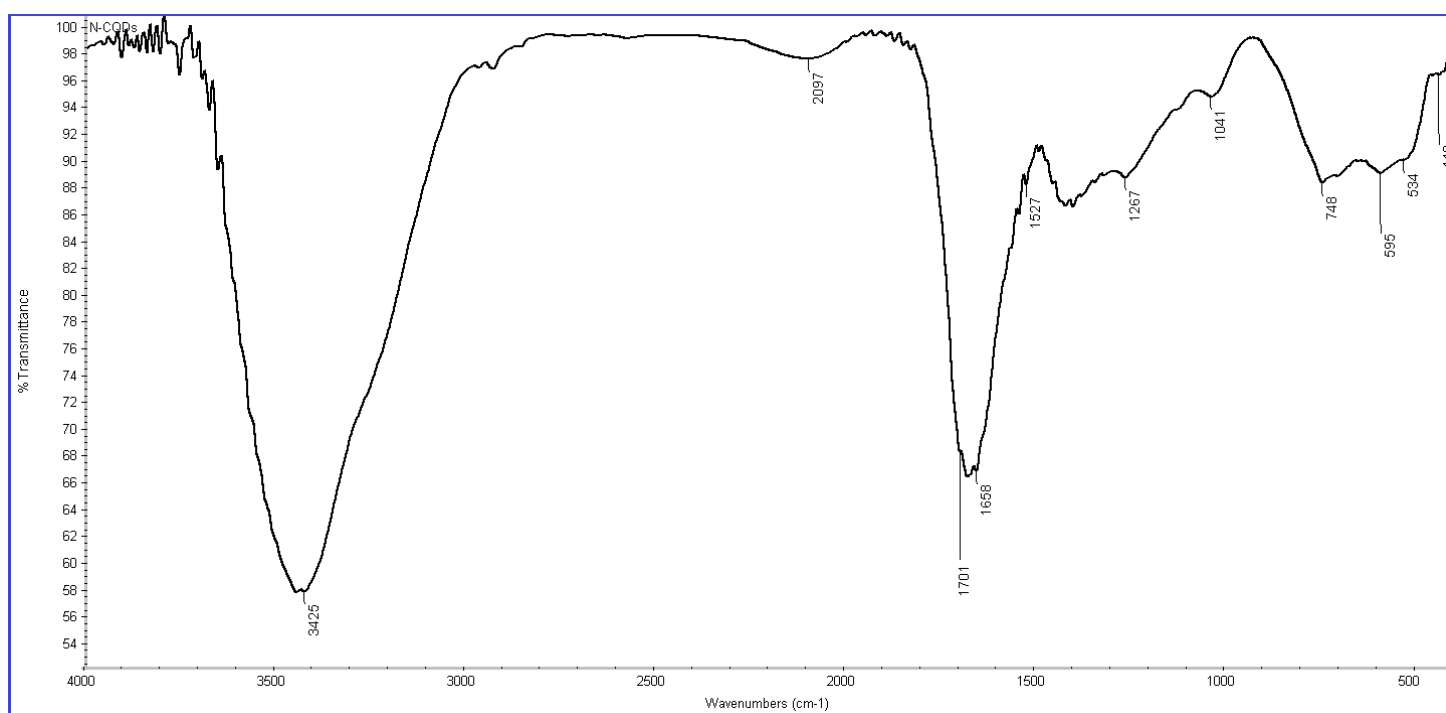

Figure S6. FTIR spectrum presenting the surface functionality of N-CQDs.
